# Supplementary material for: Ant Diversity Declines with Increasing Elevation along the Udzungwa Mountains, Tanzania
Source: MDPI journal article supplement (doi:10.3390/d14040260), 2022-03-30
Supplement: s1 [file s1]

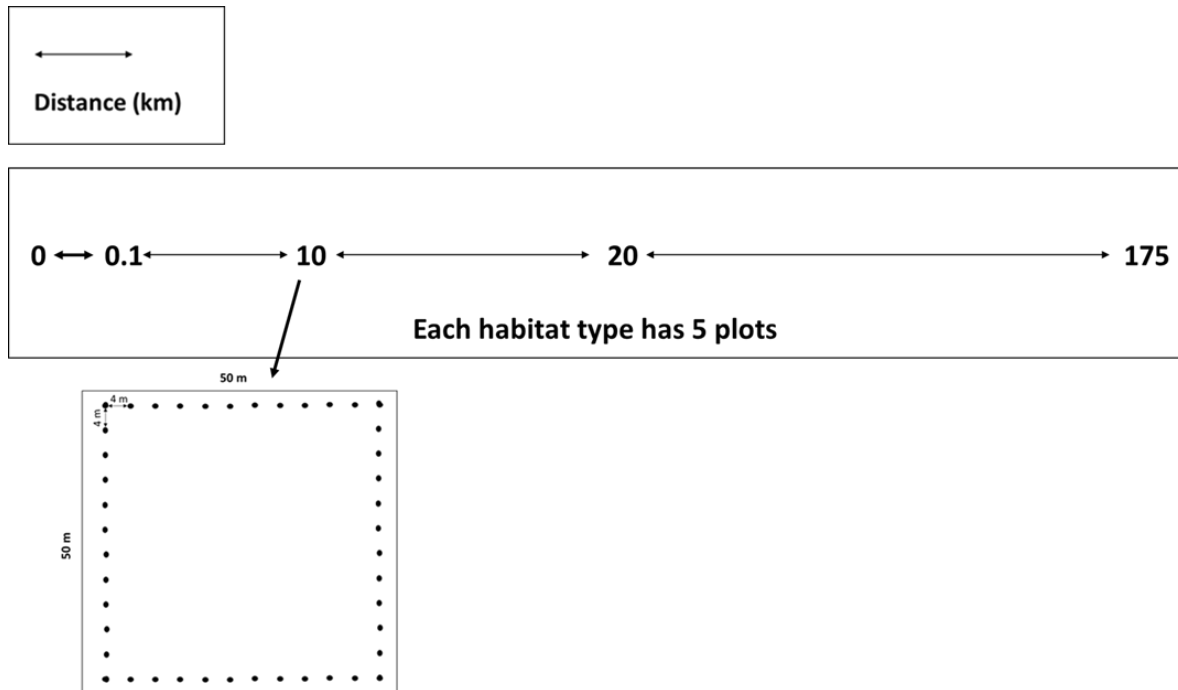

**Figure S1.** Spatial design of the 15 (50m x 50m) sampling plots. Within each plot we set up 48 pitfall traps (12 on each side) 4 m apart.

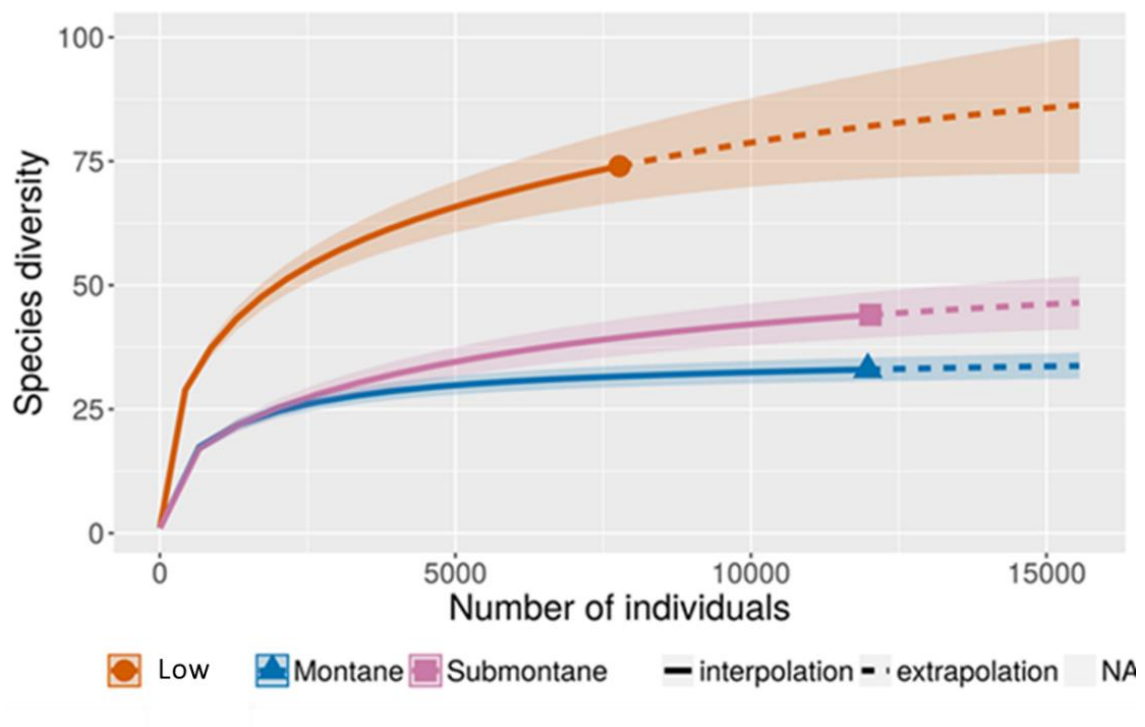

**Figure S2.** Interpolation and extrapolation of species diversity at three forest types (lower elevation, sub-montane, montane) across the studied communities.

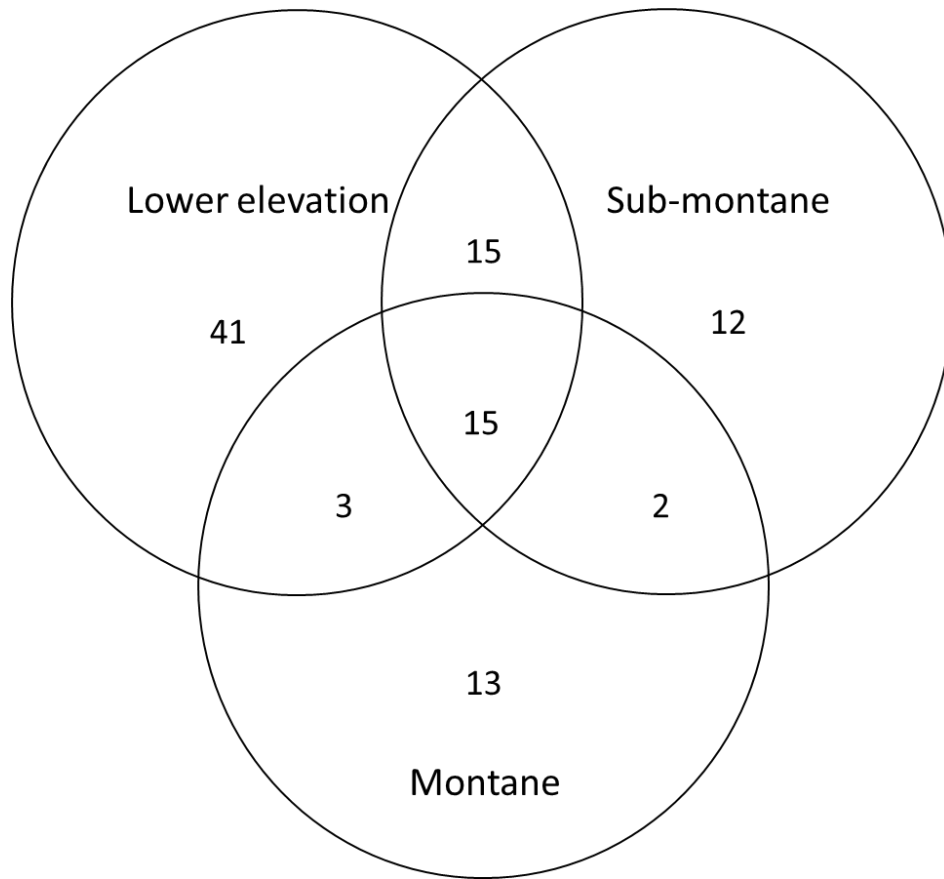

**Figure S3.** A Venn diagram showing the number of species restricted and shared within the three forest types of the Udzungwa mountains.

**Table S1.** Checklist of subfamilies and ant (morpho)species collected in three main forest types of the Udzungwa mountains.

| Subfamilies and species                            | Habitat type    |             |         |
|----------------------------------------------------|-----------------|-------------|---------|
|                                                    | Lower elevation | Sub-montane | Montane |
| <b>Dolichoderinae</b>                              |                 |             |         |
| <i>Technomyrmex</i> sp.01                          | 2               | 0           | 0       |
| <i>Technomyrmex</i> sp.02                          | 1               | 0           | 0       |
| <i>Technomyrmex</i> sp.03                          | 0               | 1           | 0       |
| <b>Dorylinae</b>                                   |                 |             |         |
| <i>Aenictus</i> sp.01                              | 0               | 2           | 0       |
| <i>Dorylus helvolus</i>                            | 4393            | 134         | 8733    |
| <i>Parasyscia</i> sp.01                            | 0               | 3           | 0       |
| <i>Parasyscia</i> sp.02                            | 0               | 1           | 0       |
| <b>Formicinae</b>                                  |                 |             |         |
| <i>Camponotus</i> sp.01 ( <i>maculatus</i> gp.)    | 21              | 11          | 10      |
| <i>Camponotus</i> sp.02 ( <i>etiolipes</i> gp.)    | 16              | 1           | 0       |
| <i>Camponotus</i> sp.03 ( <i>cintellus</i> gp.)    | 1               | 0           | 0       |
| <i>Camponotus</i> sp.04 ( <i>maculatus</i> gp.)    | 5               | 0           | 0       |
| <i>Camponotus</i> sp.05 ( <i>niveosetosus</i> gp.) | 1               | 2           | 0       |

|                                                 |     |      |      |
|-------------------------------------------------|-----|------|------|
| <i>Lepisiota cf. crinite</i>                    | 0   | 0    | 5    |
| <i>Lepisiota</i> sp.01 ( <i>capensis</i> gp.)   | 31  | 3    | 160  |
| <i>Lepisiota</i> sp.02                          | 3   | 0    | 0    |
| <i>Lepisiota</i> sp.03                          | 5   | 0    | 0    |
| <i>Lepisota</i> sp.03                           | 2   | 0    | 0    |
| <i>Nylanderia</i> sp.01                         | 137 | 18   | 0    |
| <i>Plagiolepis</i> sp.01                        | 5   | 0    | 0    |
| <i>Plagiolepis</i> sp.02                        | 2   | 0    | 0    |
| <i>Plagiolepis</i> sp.03                        | 0   | 0    | 1    |
| <i>Polyrhachis</i> sp.01                        | 8   | 6    | 0    |
| <i>Polyrhachis</i> sp.02                        | 1   | 0    | 0    |
| <i>Tapinolepis</i> sp.03                        | 0   | 0    | 2    |
| <i>Tapinolepis</i> sp.01                        | 1   | 0    | 0    |
| <i>Tapinolepis</i> sp.02                        | 0   | 2    | 4    |
| <b>Myrmicinae</b>                               |     |      |      |
| <i>Calyptomyrmex</i> sp.01                      | 0   | 1    | 0    |
| <i>Cardiocondyla</i> sp.01                      | 0   | 0    | 6    |
| <i>Carebara</i> sp.01                           | 11  | 9    | 0    |
| <i>Carebara</i> sp.02                           | 104 | 0    | 2    |
| <i>Catalaucus</i> sp.01                         | 0   | 1    | 0    |
| <i>Crematogaster</i> sp.01                      | 8   | 0    | 13   |
| <i>Crematogaster</i> sp.02                      | 5   | 0    | 0    |
| <i>Crematogaster</i> sp.03                      | 8   | 0    | 0    |
| <i>Crematogaster</i> sp.04                      | 4   | 6    | 5    |
| <i>Crematogaster</i> sp.05                      | 1   | 0    | 0    |
| <i>Melissotarsus emeryi</i>                     | 1   | 0    | 0    |
| <i>Meranoplus</i> sp.01                         | 7   | 0    | 0    |
| <i>Microdaceton</i> sp.01                       | 1   | 0    | 0    |
| <i>Monomorium</i> sp.01                         | 27  | 0    | 0    |
| <i>Monomorium</i> sp.02                         | 1   | 21   | 0    |
| <i>Myrmecaria rustica angustior</i>             | 224 | 8539 | 1749 |
| <i>Pheidole</i> sp.01 ( <i>crassinoda</i> gp.)  | 181 | 895  | 641  |
| <i>Pheidole</i> sp.02                           | 351 | 548  | 11   |
| <i>Pheidole</i> sp.03                           | 348 | 6    | 0    |
| <i>Pheidole</i> sp.04 ( <i>megacephala</i> gp.) | 699 | 401  | 193  |
| <i>Pheidole</i> sp.05                           | 85  | 0    | 0    |
| <i>Pheidole</i> sp.06                           | 8   | 115  | 18   |
| <i>Pheidole</i> sp.07 ( <i>liengmei</i> gp.)    | 225 | 0    | 0    |
| <i>Pheidole</i> sp.08                           | 15  | 3    | 0    |
| <i>Solenopsis</i> sp.01                         | 191 | 39   | 63   |

|                                                      |     |     |    |
|------------------------------------------------------|-----|-----|----|
| <i>Solenopsis</i> sp.02                              | 9   | 3   | 0  |
| <i>Strumigenys</i> sp.01                             | 1   | 14  | 3  |
| <i>Strumigenys</i> sp.02                             | 4   | 6   | 0  |
| <i>Strumigenys</i> sp.03                             | 6   | 0   | 0  |
| <i>Strumigenys</i> sp.04                             | 0   | 21  | 21 |
| <i>Strumigenys</i> sp.05                             | 0   | 1   | 0  |
| <i>Strumigenys</i> sp.06                             | 0   | 0   | 6  |
| <i>Tetramorium</i> cf. <i>yarthiellum</i>            | 104 | 0   | 0  |
| <i>Tetramorium</i> sp.01 ( <i>setigerum</i> gp.)     | 38  | 0   | 0  |
| <i>Tetramorium</i> sp.02 ( <i>setigerum</i> gp.)     | 1   | 0   | 0  |
| <i>Tetramorium</i> sp.03 ( <i>weitzeckeri</i> gp.)   | 125 | 738 | 95 |
| <i>Tetramorium</i> sp.04 ( <i>setigerum</i> gp.)     | 2   | 0   | 0  |
| <i>Tetramorium</i> sp.05 ( <i>gabonense</i> gp.)     | 16  | 0   | 0  |
| <i>Tetramorium</i> sp.06                             | 1   | 0   | 0  |
| <i>Tetramorium</i> sp.07 ( <i>notiale</i> gp.)       | 3   | 2   | 1  |
| <i>Tetramorium</i> sp.08                             | 1   | 0   | 0  |
| <i>Tetramorium</i> sp.09                             | 1   | 0   | 0  |
| <i>Tetramorium</i> sp.10 ( <i>sereceiventre</i> gp.) | 1   | 0   | 0  |
| <i>Tetramorium</i> sp.11 ( <i>simillimum</i> gp.)    | 40  | 1   | 4  |
| <i>Tetramorium</i> sp.12                             | 1   | 0   | 0  |
| <i>Tetramorium</i> sp.13                             | 0   | 3   | 0  |
| <i>Tetramorium</i> sp.14                             | 0   | 0   | 40 |
| <i>Tetramorium</i> sp.14 ( <i>rhpatomyrmex</i> gp.)  | 0   | 1   | 0  |
| <i>Tetramorium</i> sp.15 ( <i>notiale</i> gp.)       | 0   | 0   | 9  |
| <i>Tetramorium</i> sp.16                             | 0   | 0   | 6  |
| <i>Tetramorium</i> sp.17 ( <i>squaminode</i> gp.)    | 0   | 0   | 19 |

### **Ponerinae**

|                           |    |    |   |
|---------------------------|----|----|---|
| <i>Anochectus</i> sp.01   | 1  | 1  | 0 |
| <i>Anochectus</i> sp.02   | 2  | 0  | 0 |
| <i>Anochectus</i> sp.03   | 1  | 0  | 0 |
| <i>Hypoponera</i> sp.04   | 2  | 0  | 0 |
| <i>Bothroponera</i> sp.01 | 0  | 3  | 0 |
| <i>Bothroponera</i> sp.01 | 10 | 60 | 0 |
| <i>Bothroponera</i> sp.02 | 2  | 0  | 0 |
| <i>Bothroponera</i> sp.03 | 3  | 1  | 0 |
| <i>Cryptopone</i> sp.01   | 0  | 0  | 1 |
| <i>Hypoponera</i> sp.01   | 1  | 0  | 0 |
| <i>Hypoponera</i> sp.02   | 2  | 0  | 0 |
| <i>Hypoponera</i> sp.03   | 0  | 0  | 6 |

|                                 |     |     |    |
|---------------------------------|-----|-----|----|
| <i>Hypoponera</i> sp.04         | 2   | 0   | 0  |
| <i>Leptogenys</i> sp.01         | 5   | 386 | 42 |
| <i>Leptogenys</i> sp.02         | 0   | 2   | 0  |
| <i>Leptogenys</i> sp.03         | 2   | 0   | 0  |
| <i>Leptogenys</i> sp.04         | 0   | 0   | 12 |
| <i>Megaponera analis rapax</i>  | 209 | 1   | 0  |
| <i>Mesoponera</i> sp.01         | 3   | 0   | 0  |
| <i>Mesoponera</i> sp.02         | 4   | 0   | 19 |
| <i>Mesoponera</i> sp.03         | 4   | 5   | 0  |
| <i>Odontomachus assiniensis</i> | 8   | 0   | 0  |
| <i>Plectroctena</i> sp.01       | 1   | 0   | 0  |
| <i>Plectroctena</i> sp.02       | 0   | 4   | 0  |
| <i>Plectroctena</i> sp.03       | 0   | 0   | 77 |

---
